# Supplementary material
Source: ML conference proceedings conference paper supplement (https://proceedings.mlr.press/v48/reed16.html)
Supplement: Supplementary file 3 [file reed16-supp.zip]

Representative sentence for 20 test classes

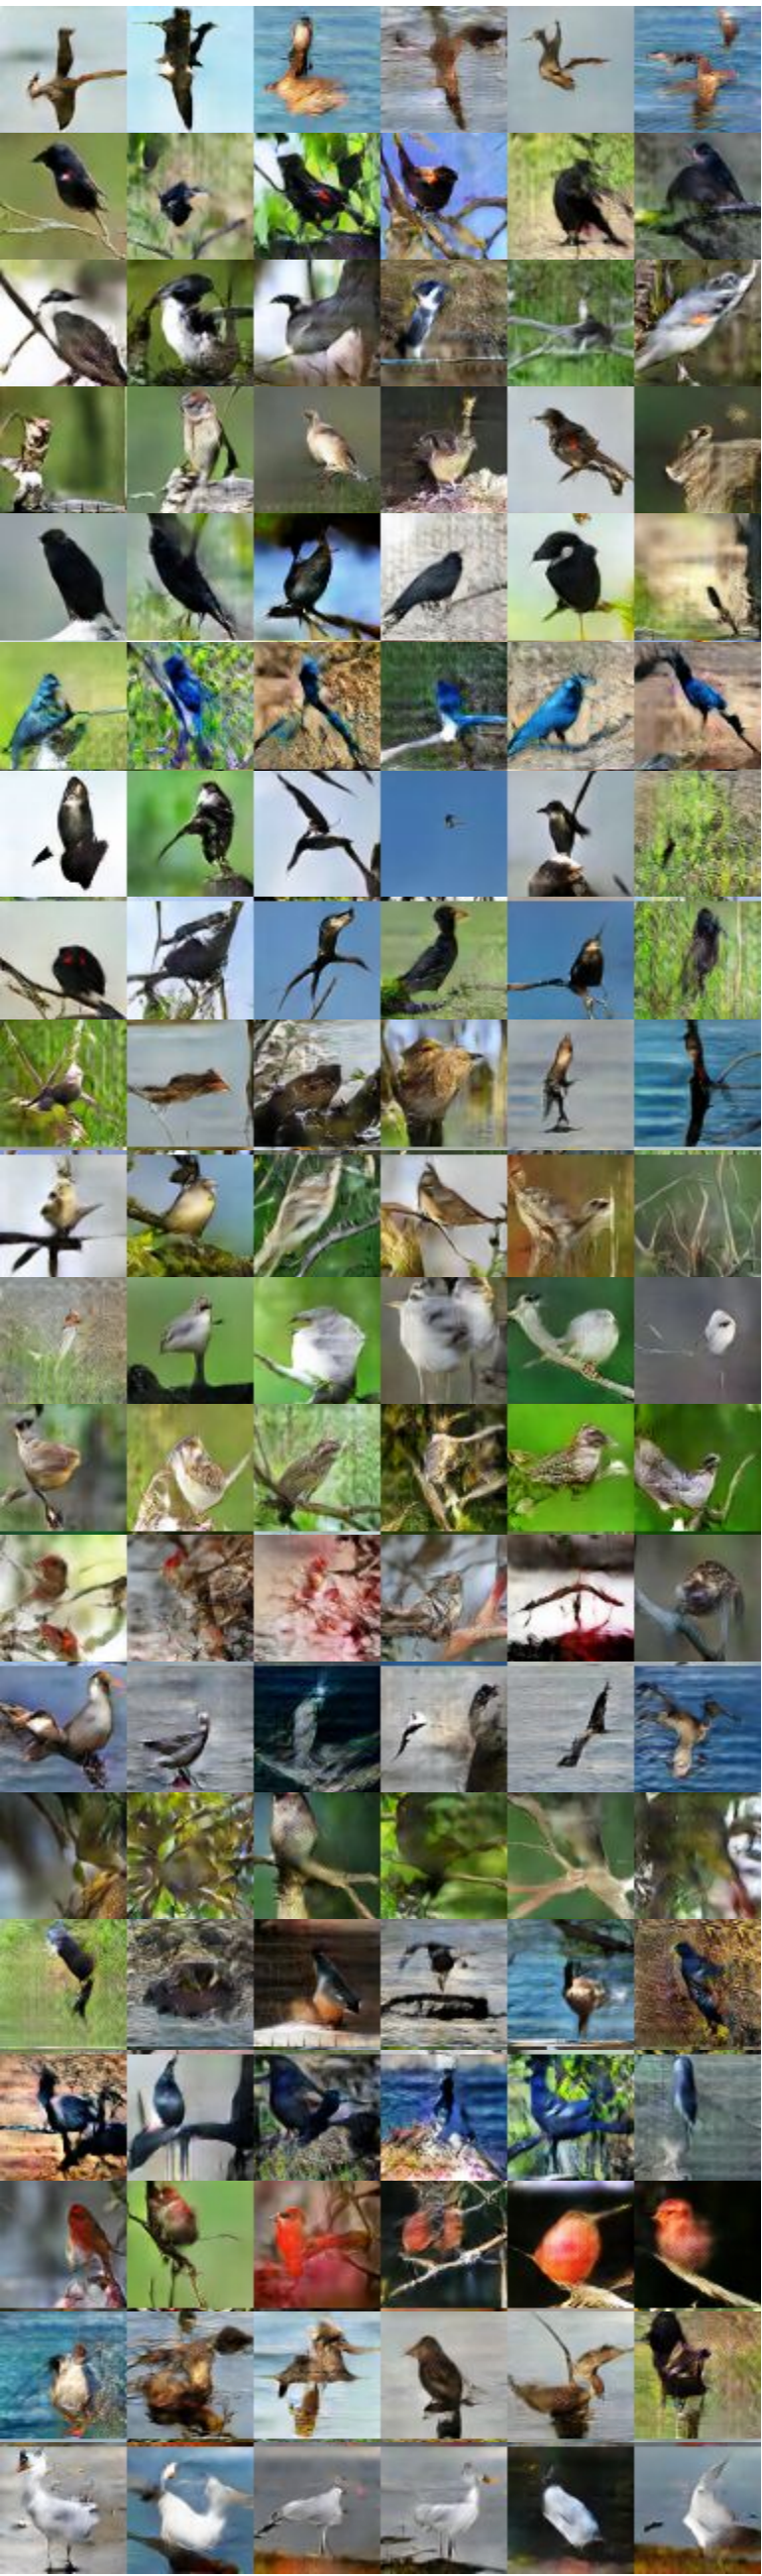

[class01] a medium-sized brown bird with a long, thick bill, large wings and a long neck compared to its body.

[class04] the bird has a small bill as well as a black breast and belly.

[class06] this black and white bird has a small beak, and the head is small compared to the body.

[class08] a bird with brown tones all over and a striped head with a stout beak

[class09] a bird with a meedium sized, medium width pointed bill, all black feathers, a small head, and yellowish eyes

[class14] this bird is all blue, the top part of the bill is blue, but the bottom half is white.

[class23] this is a black bird with a white throat and a long pointy beak.

[class29] this black bird has no crest and a medium pointed bill and a short tail.

[class31] tiny brown bird with white breast and a short stubby bill.

[class33] the head wings and tail are grayish brown, the beak is yellow and the throat and belly are white.

[class34] the bird has a yellow bill that is small and small crown.

[class35] this small bird has a speckled body with small stripes on the wings and a short, thick beak.

[class36] a small black spotted bird with red and white hues.

[class37] this bird is brown with gray wings and retrices. the wingbar and eye ring are white.

[class38] beautiful gray and green breasted bird with a sharp pointy black beak

[class43] this small bird has a dark green head, a dark yellow bill, and wings with black colored feathers.

[class49] bird with wide wing span blue top body feathers and black face long gray beak

[class51] the bird has an eyering that is red and a small bill.

[class53] a large duck has a long pointed bill, a large white neck, and light brown feathers.

[class66] the bird has a yellow bill, pink webbed feet, a white body with gray wings and gray tail feathers

Representative sentence for 20 train classes

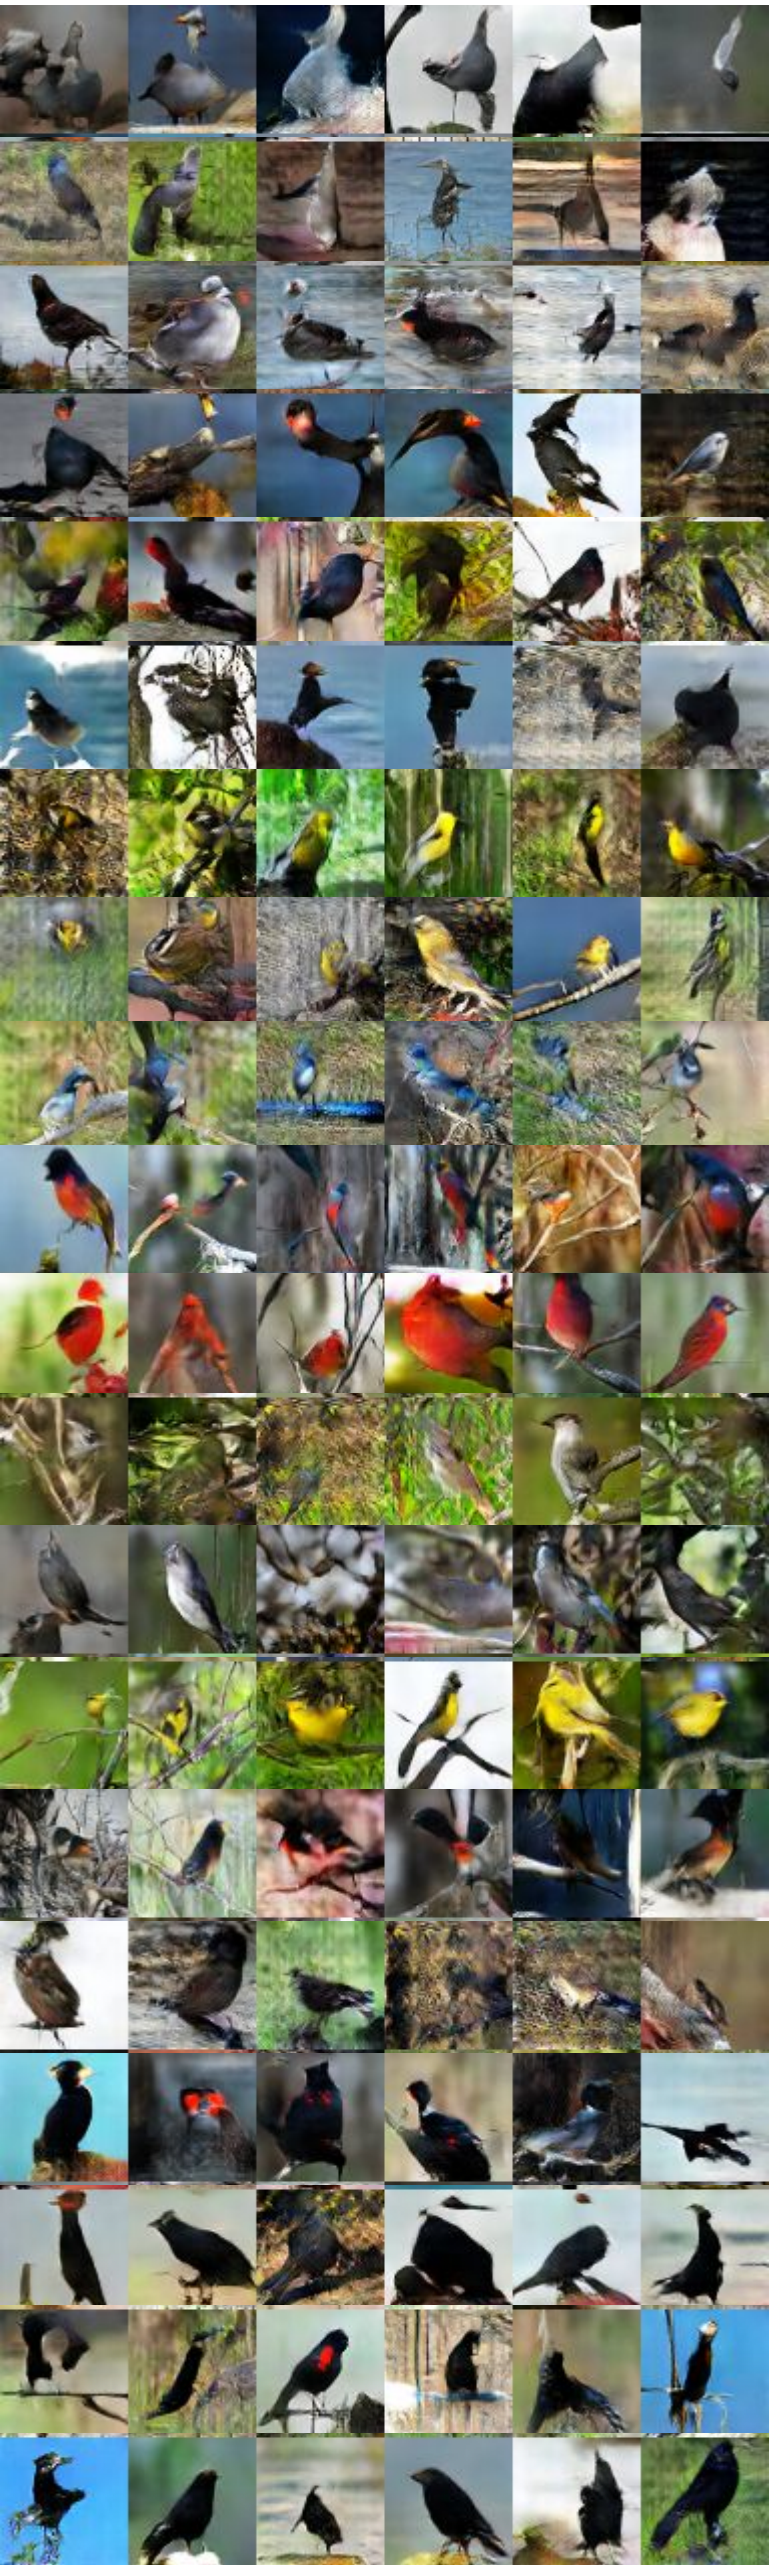

[class02] large bird with long orange beak, white body feathers and black wing feathers

[class03] this bird is mostly gray with a hooked bill.

[class05] the bird's eyering is white and the bill is orange.

[class07] the bird has a small curved bill that is orange.

[class10] a bird with a large pointed bill and all black plumage except for its bright orange coverts.

[class11] the bird is solid black with white eyes and a black beak.

[class12] the bird has a yellow breast and black belly as well as a small bill.

[class13] a taller bird with a yellow name, black and white spotted body, and some white on its back.

[class15] this colorful bird has blue crown, neck, throat and brown with white belly and breast

[class16] this small bird is beautiful with color, a deep orange body, and purple bluish head.

[class17] a small sized bird that has tones of brown and dark red with a short stout bill

[class18] this small bird has a green and white speckled breast and belly, gray tail feathers, and a gray bill and head.

[class19] small grey bird with black coloration on beak, tarsus, feet, crown and tail.

[class20] this bird has a yellow breast and a dark grey face.

[class21] this small bird has a black head and throat, black and white wings and tail, a dusty orange breast and belly, and, a short, pointed black bill and rosy pink feet.

[class22] the small bird has very dark colored feathers, and slanty eyes.

[class24] a distinct black bird with a red cheek, and a blue and white rounded bill.

[class25] a bird with black plumage all over, black feet, long neck and gray and yellow bill.

[class26] a shiny all black bird with a bright orange eyering, a small pointed black beak and a nape that appears to be puffed out.

[class27] this black bird looks like a crow, he has velvety black feathers.
