# Supplementary material
Source: ML conference proceedings conference paper supplement (https://proceedings.mlr.press/v48/reed16.html)
Supplement: Supplementary file 5 [file reed16-supp.zip]

Representative sentence for each test class

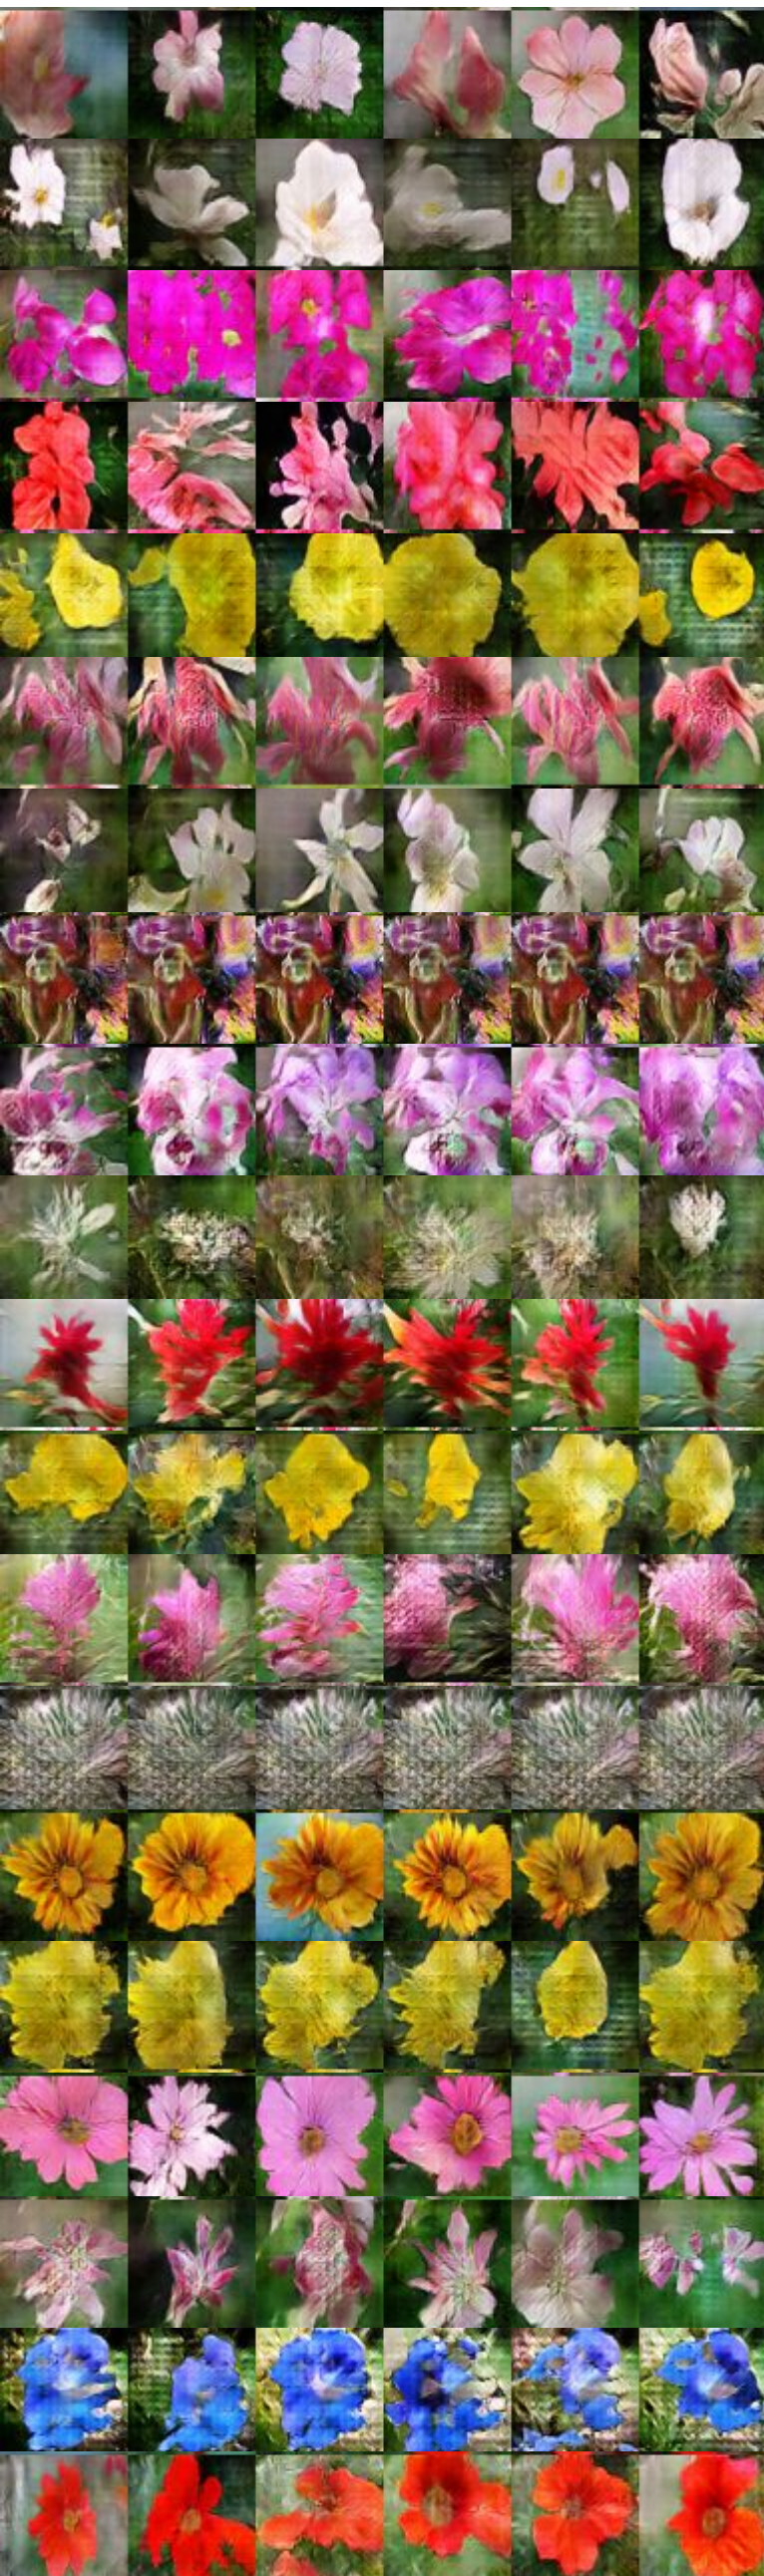

[class01] this flower is white and pink in color, with petals that have veins.

[class02] the petals of this flower are white with a short stigma

[class03] this flower has pink bell shaped petals and white stigma.

[class04] this flower is pink in color, with petals that are wavy.

[class05] this flower is yellow in color, with petals that are ruffled on the ends.

[class06] this flower is pink and purple in color, with petals that are spotted.

[class07] this flower has 3 top white petals and 3 lower petals that curve inwards, protecting the stamen and pistil.

[class08] this flower is orange and blue in color, with petals that are pointed.

[class09] these flowers have petals that start off white in color and end in a dark purple towards the tips.

[class10] the petals of this flower are green with a long stigma

[class11] this flower is red and white in color, with petals that are vertically layered

[class12] this round yellow flower has hundreds of toothpick shaped petals surrounding an inner circle full of short, ball shaped yellow stamen.

[class13] this flower has many thin hairlike purple petals surrounded by pointed, short pink petals.

[class14] this flower has many thin and pointy lavender petals that look like spikes.

[class15] bright droopy yellow petals with burgundy streaks, and a yellow stigma.

[class16] the flower has yellow petals and has a dark green stem growing from the ground.

[class17] a flower with long pink petals and raised orange stamen.

[class18] the petals of the plant are white in color with pink speckles and have green buds.

[class19] the flower shown has a blue petals with a white pistil in the center

[class20] this flower has many yellow stamen and three large red petals.

Representative sentence for 20 train classes

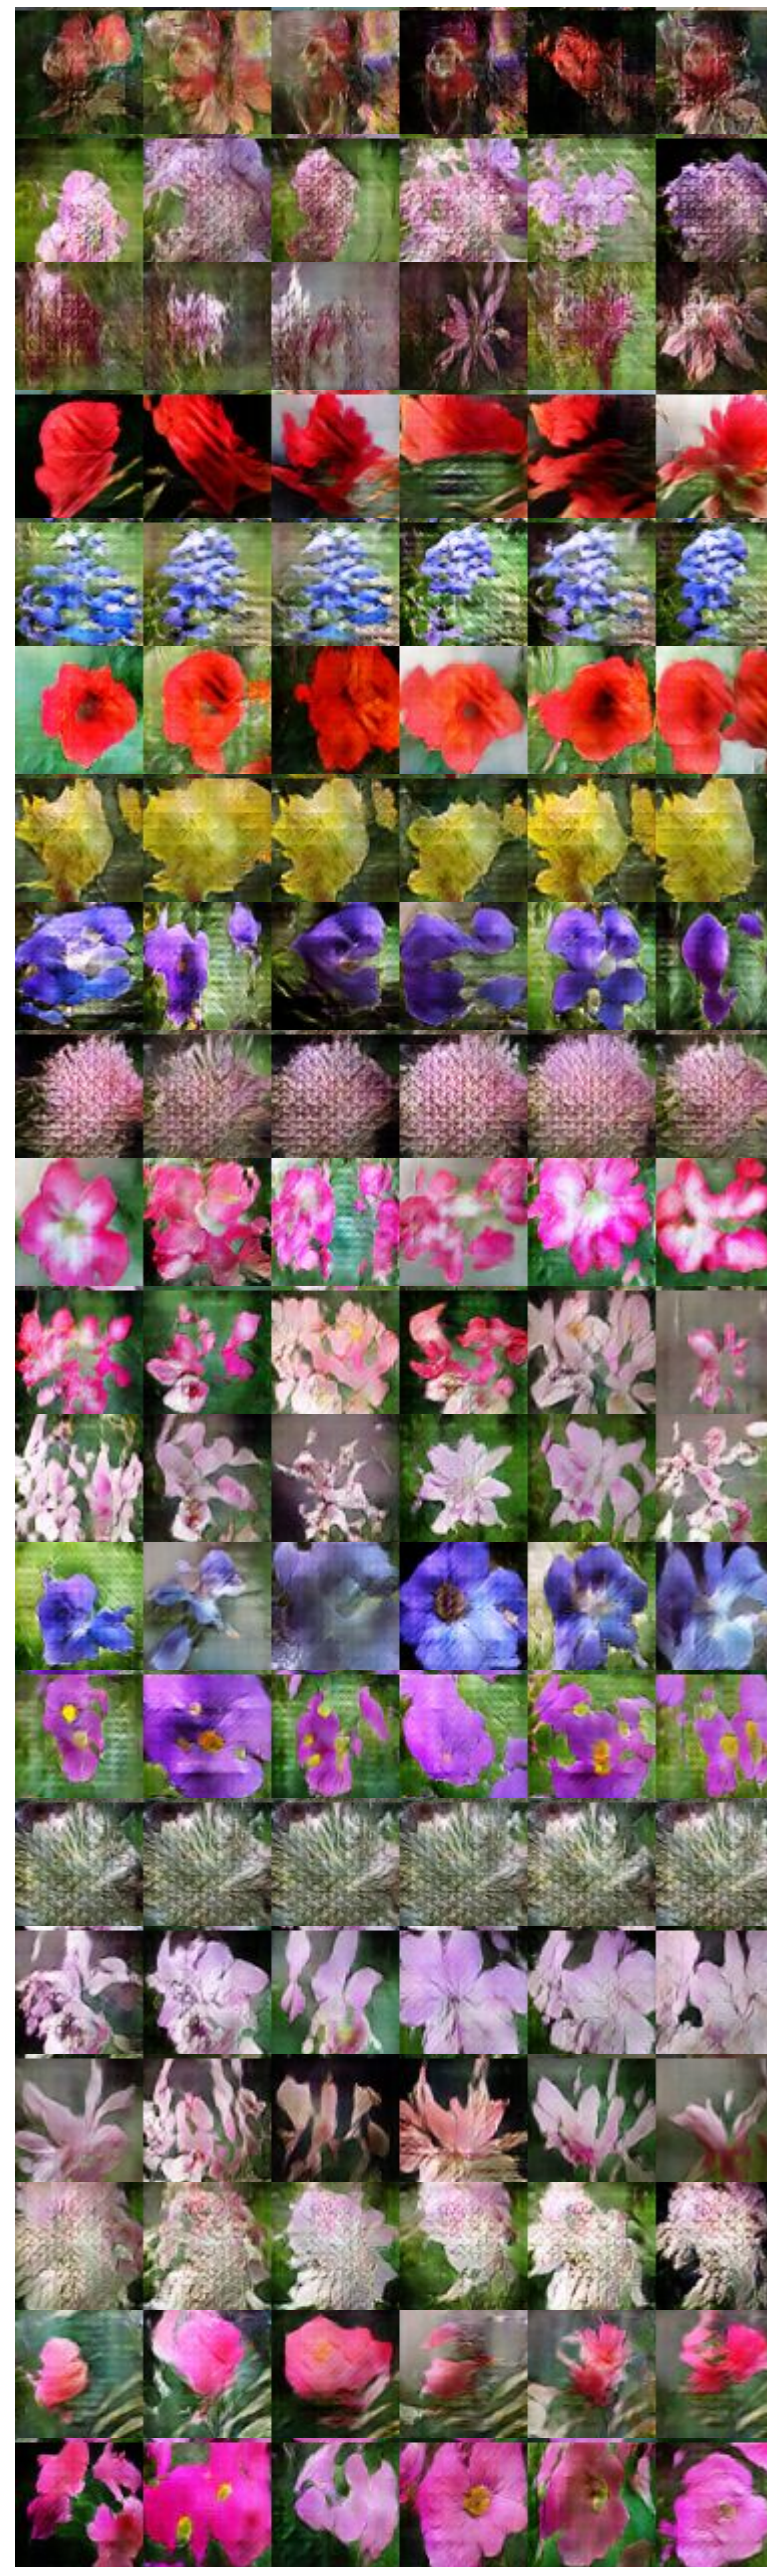

[class21] ther are longer stamens with lager green anthers

[class22] layered lilac petals below small teardrop like lilac petals obscuring the pistil.

[class23] this heavy, flower has long, purple and black pedals that hang off of of its green pedicel.

[class24] the flower has petals that are large red and overlapping.

[class25] this flower is blue and white in color, with petals that are bell shaped.

[class26] this flower has the outer row of red color petals and the inner trumpet shaped petals holding the red stamens inside

[class27] this flower has several small yellow petals, with green leaves around the petals.

[class28] this flower has petals that are purple with a white stigma

[class29] the flower has hundreds of purple anther and filament with grey petals

[class30] this flower has five overlapping pink petals with slightly serrated white edges.

[class31] this flower is white and pink in color, with petals that are pink near the edges.

[class32] the pretty flower has white petals with pink at their center.

[class33] the blue, thin overlapping petals and long green stigmas

[class34] this flower is purple and yellow in color, with petals that are ruffled on the edges.

[class35] this flower is green and white in color, with petals that are spikey.

[class36] this is a white flower with ruffled edges and a purple center.

[class37] this flower is white and pink in color, with petals that are curled and wavy.

[class38] this flower has long white petals with purple stamen in the middle of it

[class39] this flower is pink in color, with petals that are closely wrapped around the center.

[class40] this flower has round pink petals and a yellow stigma.
