# Supplementary material
Source: ML conference proceedings conference paper supplement (https://proceedings.mlr.press/v48/reed16.html)
Supplement: Supplementary file 6 [file reed16-supp.zip]

# Align-Draw

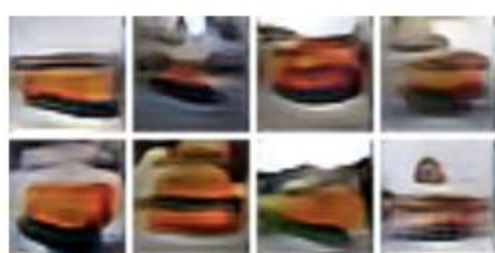

A yellow school bus parked in a parking lot.

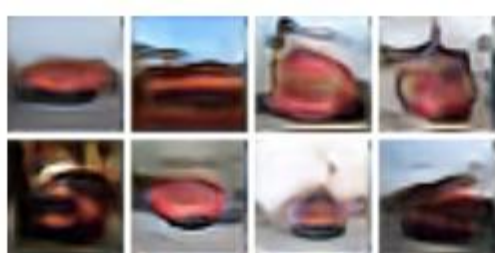

A red school bus parked in a parking lot.

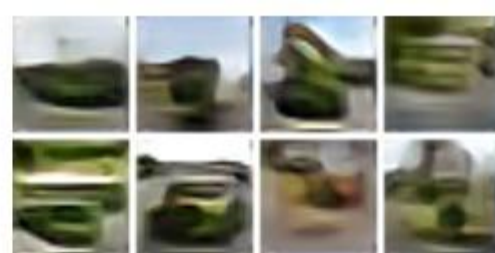

A green school bus parked in a parking lot.

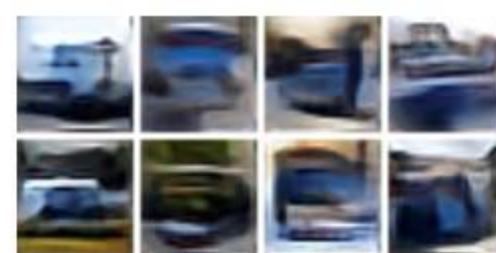

A blue school bus parked in a parking lot.

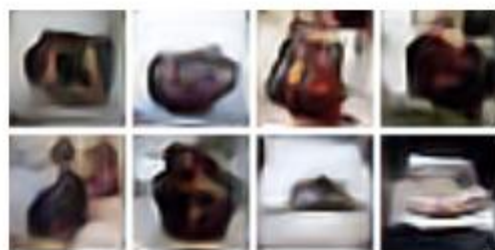

The decadent chocolate desert is on the table.

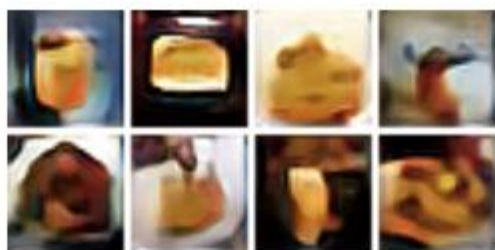

A bowl of bananas is on the table.

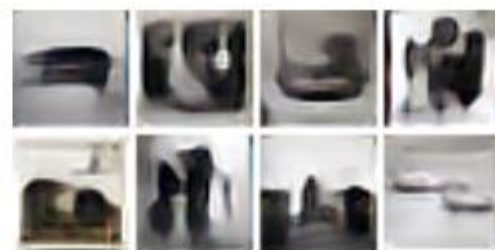

A vintage photo of a cat.

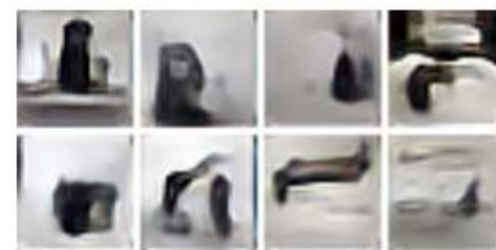

A vintage photo of a dog.

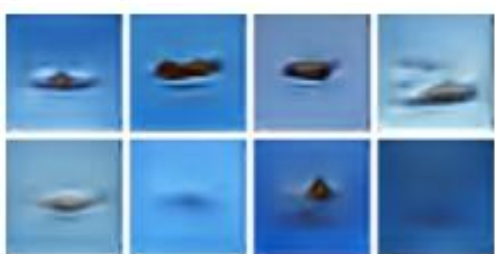

A very large commercial plane flying in blue skies.

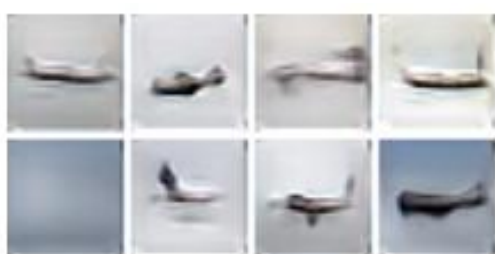

A very large commercial plane flying in rainy skies.

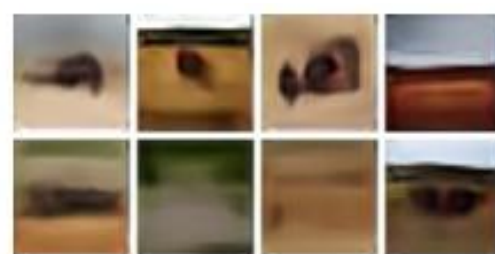

A herd of elephants walking across a dry grass field.

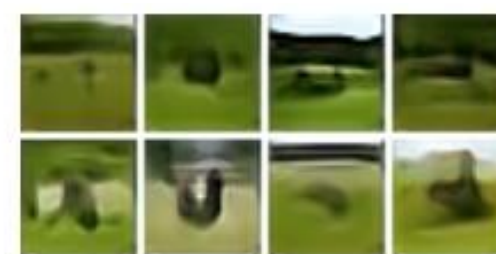

A herd of elephants walking across a green grass field.

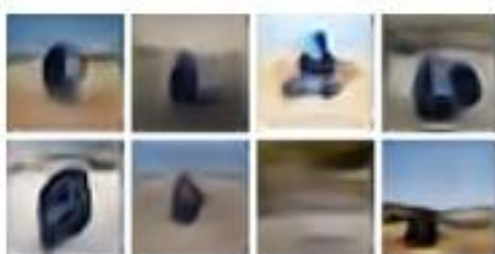

A rider on a blue motorcycle in the desert.

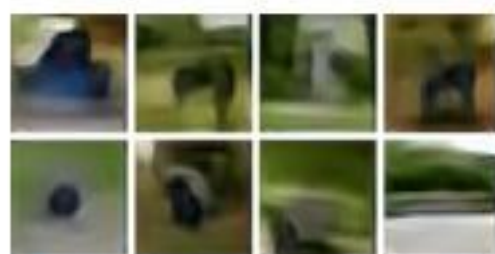

A rider on a blue motorcycle in the forest.

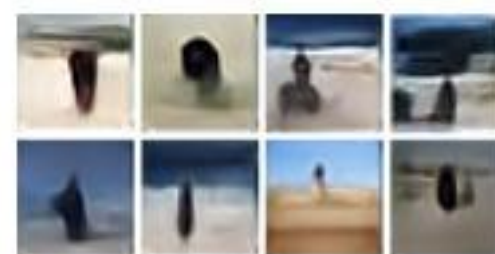

A surfer, a woman, and a child walk on the beach.

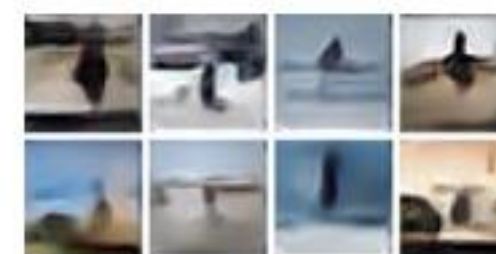

A surfer, a woman, and a child walk on the sun.

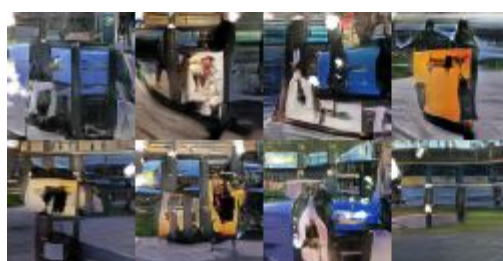

A yellow school bus parked in a parking lot.

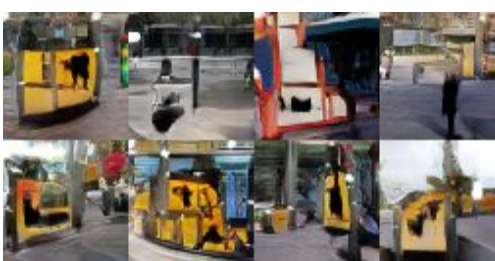

A red school bus parked in a parking lot.

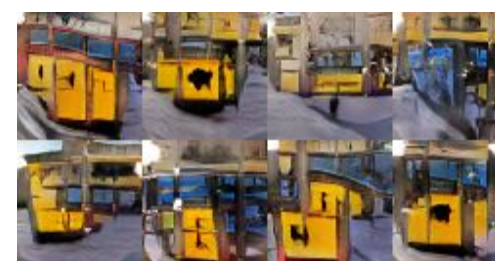

A green school bus parked in a parking lot.

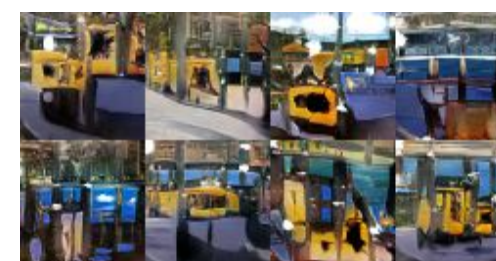

A blue school bus parked in a parking lot.

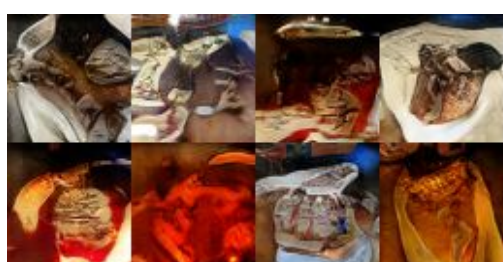

The decadent chocolate desert is on the table.

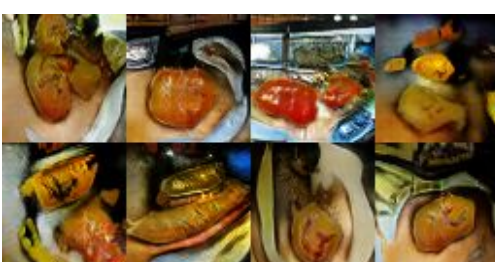

A bowl of bananas is on the table.

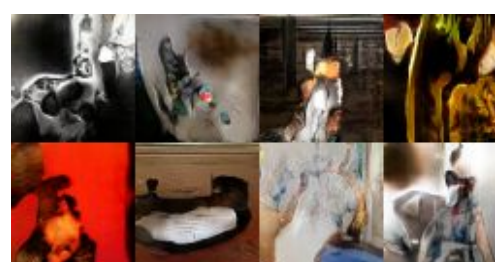

A vintage photo of a cat.

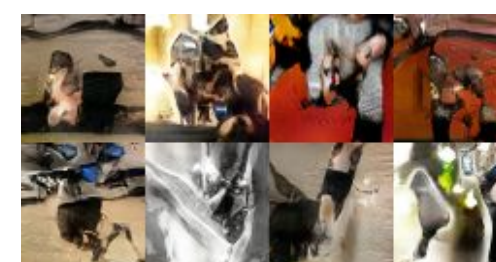

A vintage photo of a dog.

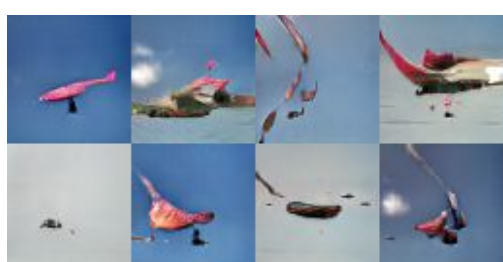

A very large commercial plane flying in blue skies

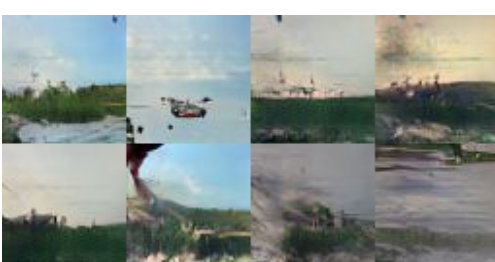

A very large commercial plane flying in rainy skies

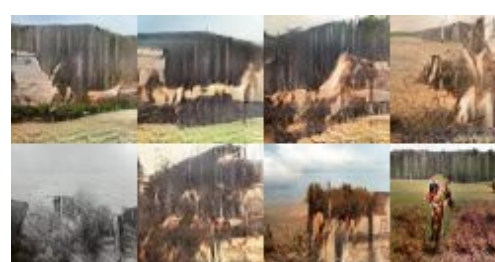

A herd of elephants walking across a dry grass field

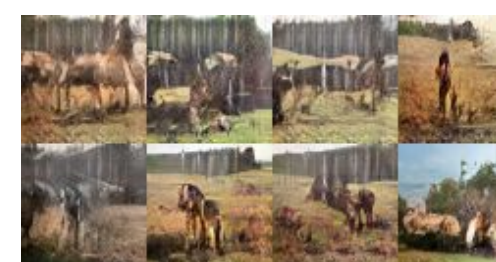

A herd of elephants walking across a green grass field

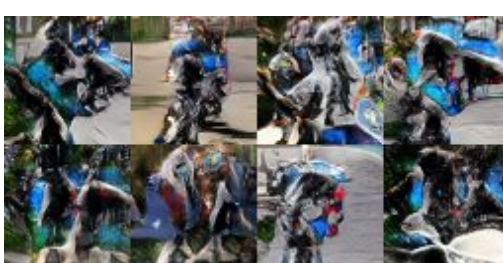

A rider on a blue motorcycle in the desert.

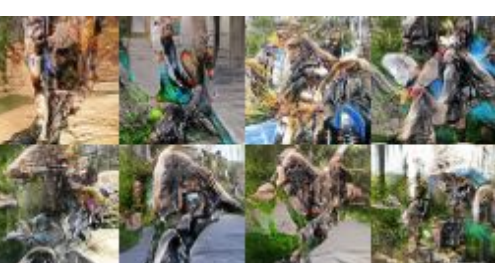

A rider on a blue motorcycle in the forest.

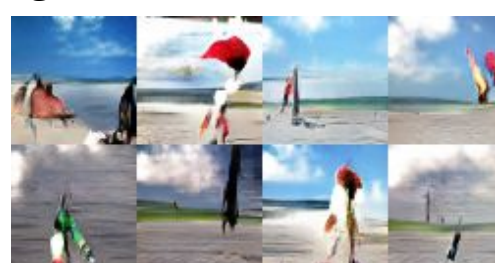

A surfer, a woman, and a child walk on the beach

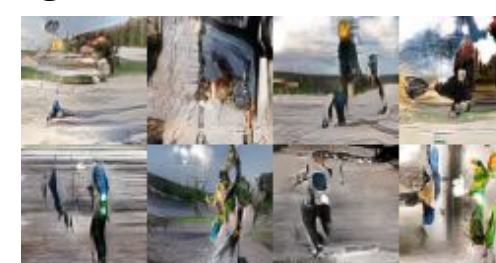

A surfer, a woman, and a child walk on the sun

# GAN
